# Supplementary material for: MFGE8 promotes adult hippocampal neurogenesis in rats following experimental subarachnoid hemorrhage via modifying the integrin β3/Akt signaling pathway
Source: PubMed Central journal article supplement (PMC11317487; doi:10.1038/s41420-024-02132-x), 2024-08-11

The original western blot bands listed below:

MFGE8

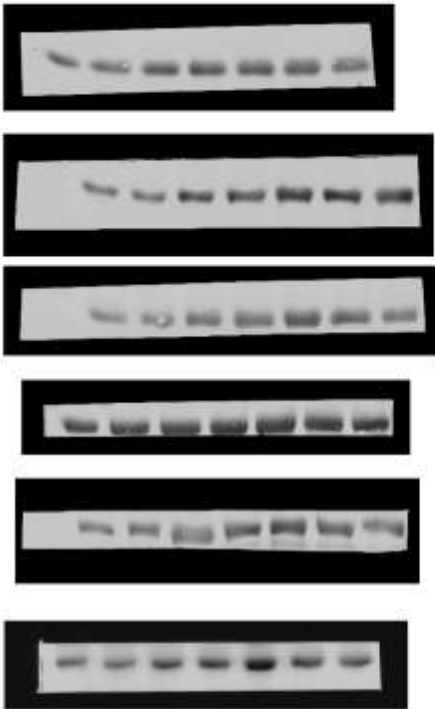

int-β3

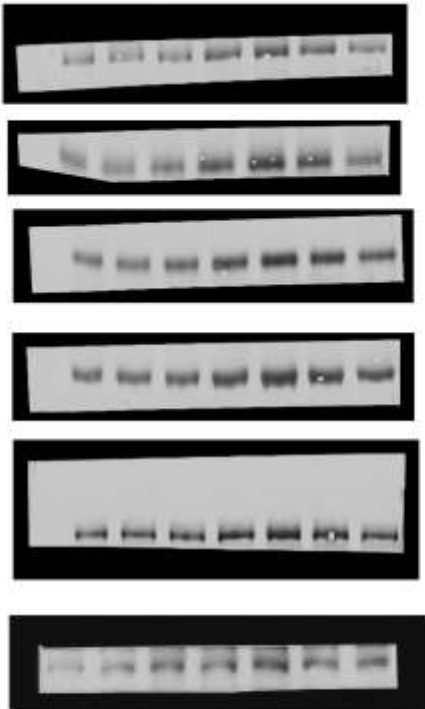

p-Akt

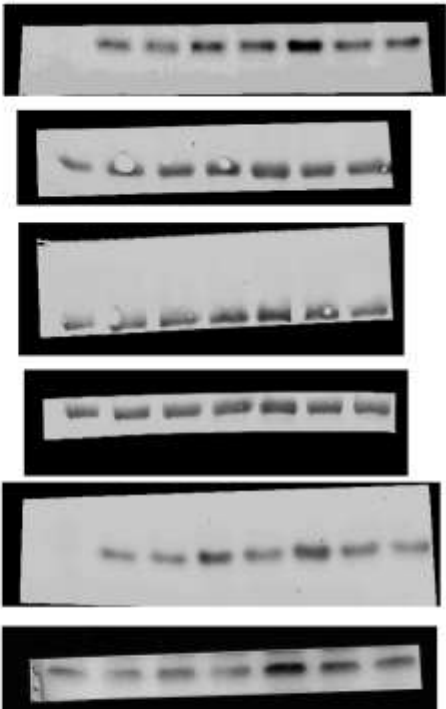

Cyclin D1

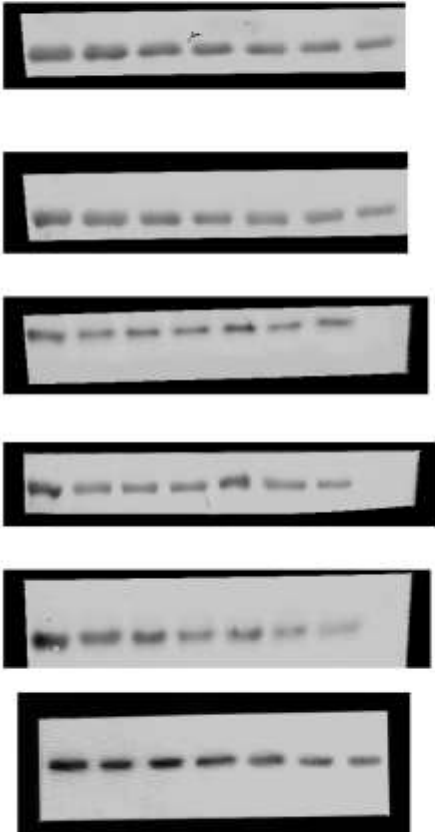

HPCA

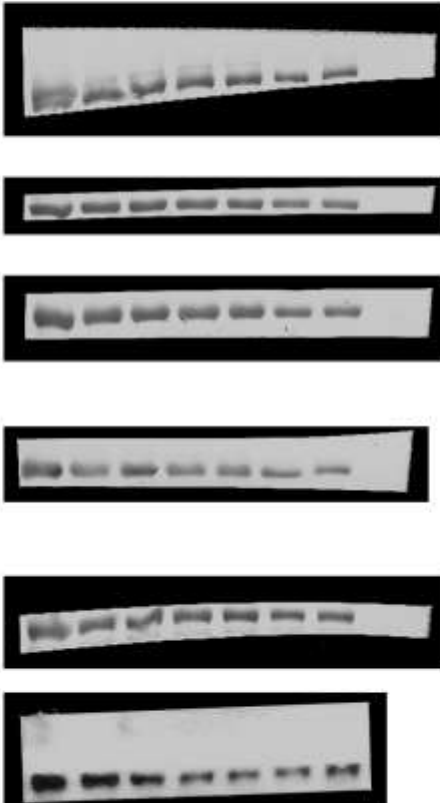

Akt

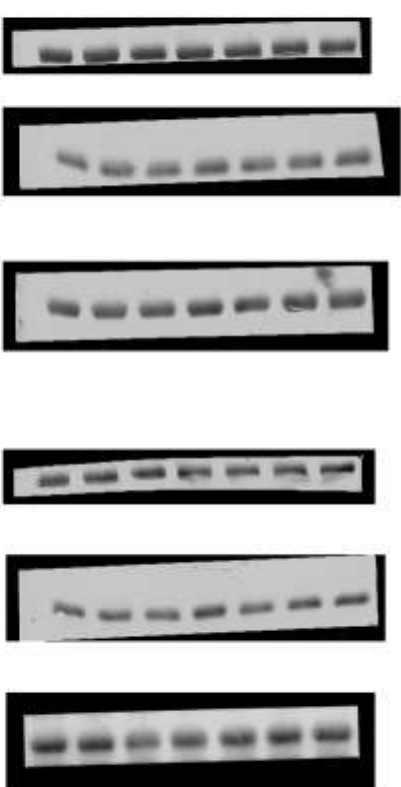

Actin

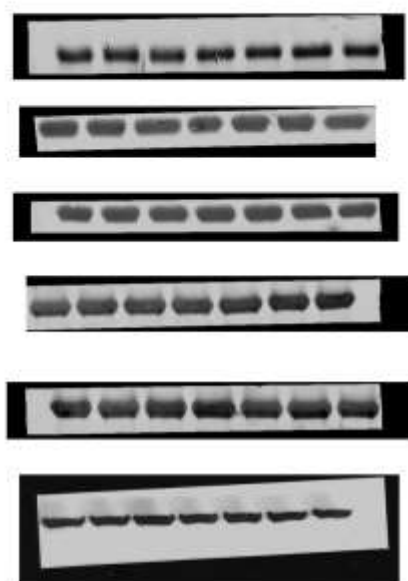

MFGE8

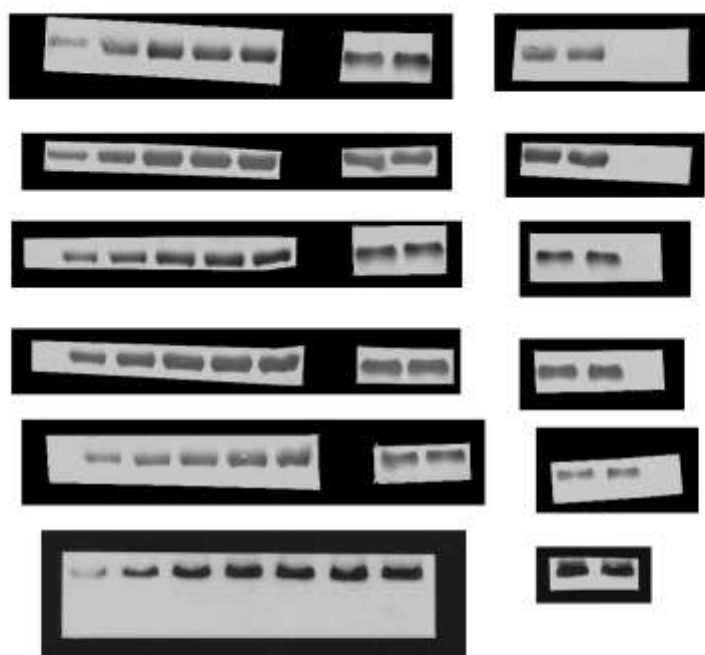

int- $\beta$ 3

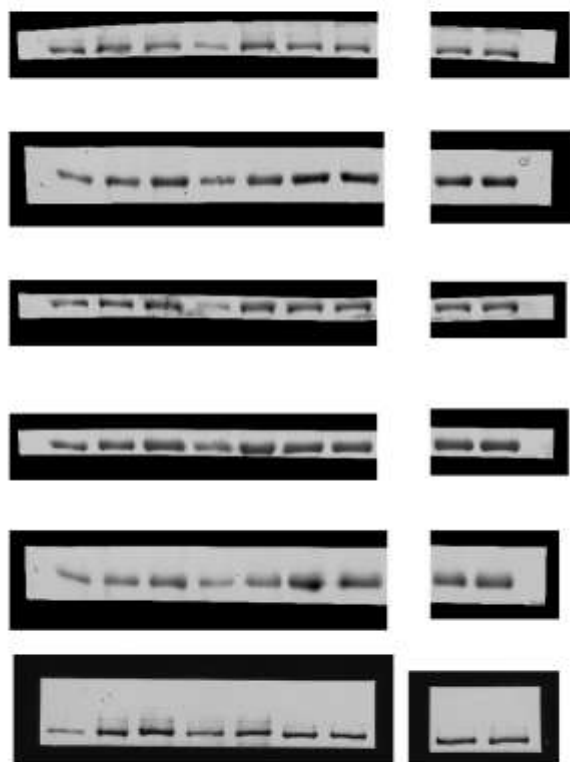

PI3K

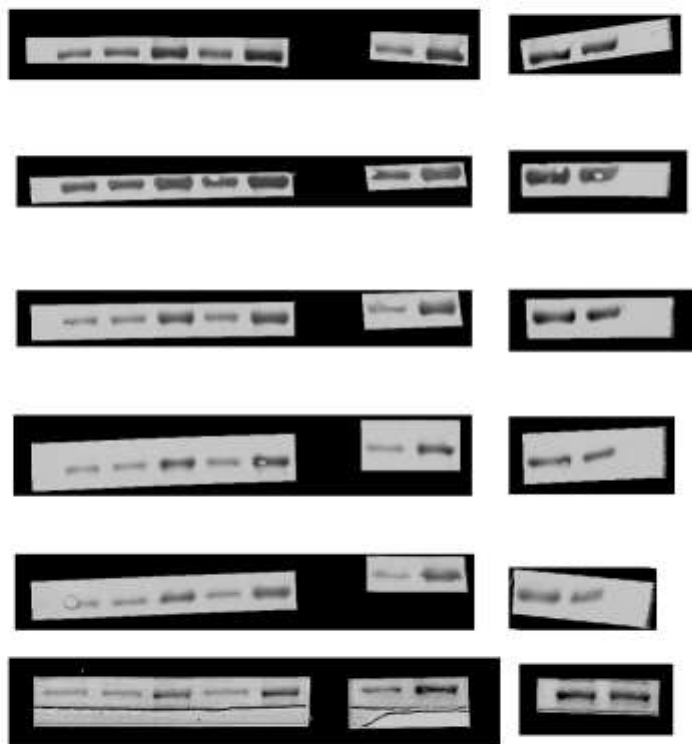

p-Akt

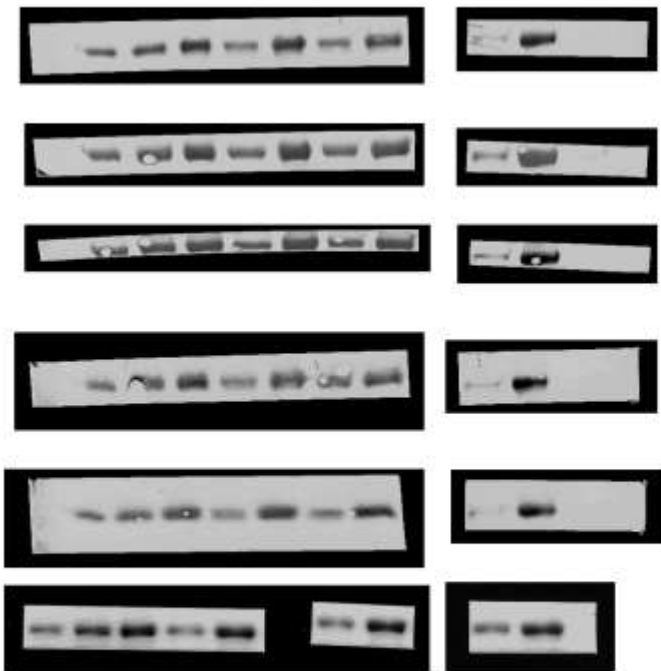

Akt

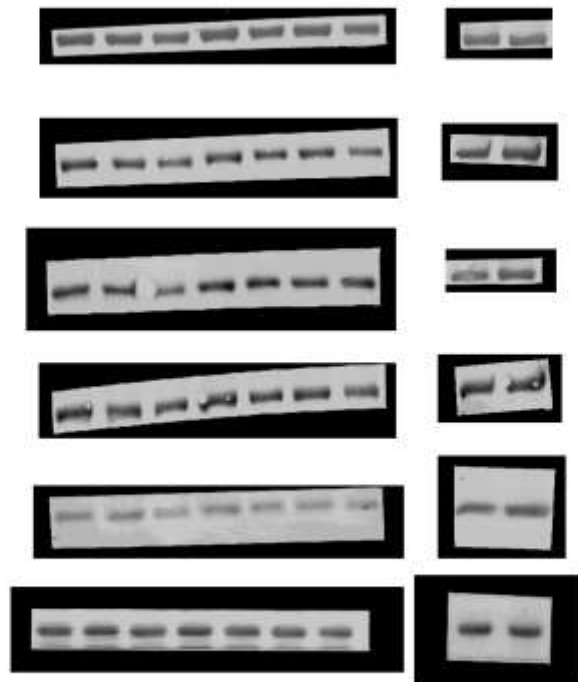

mTOR

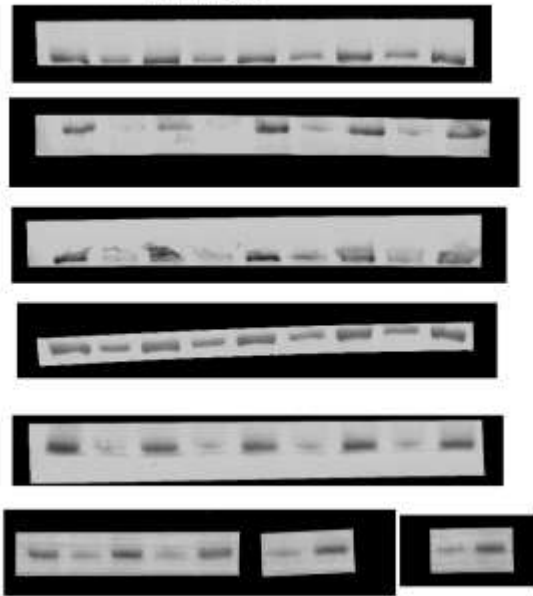

Cyclin D1

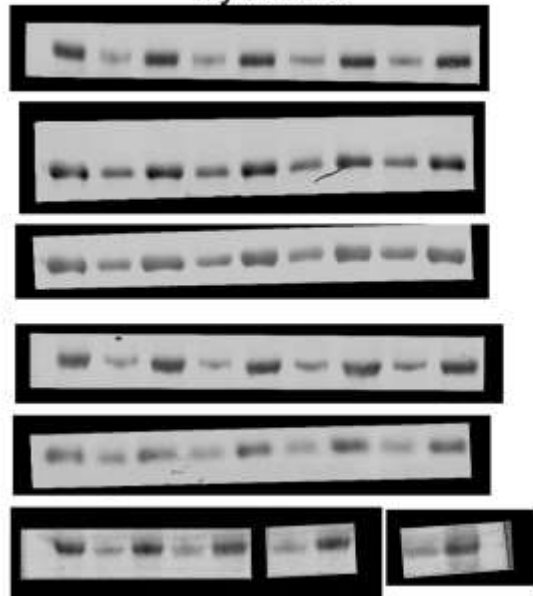

HPCA

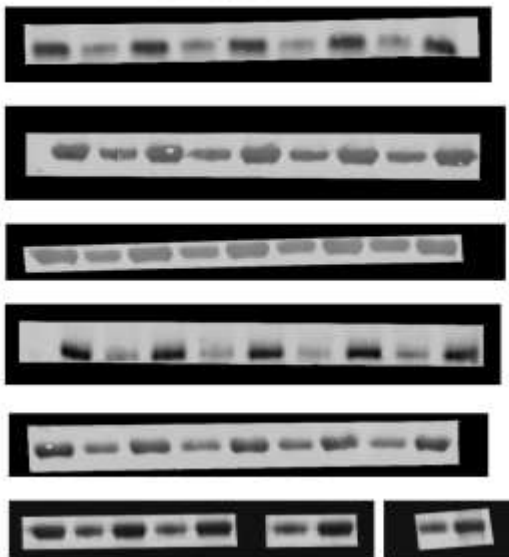

DCX

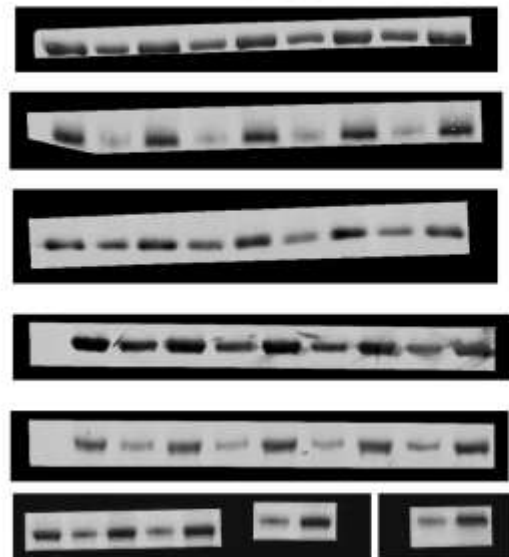

Actin

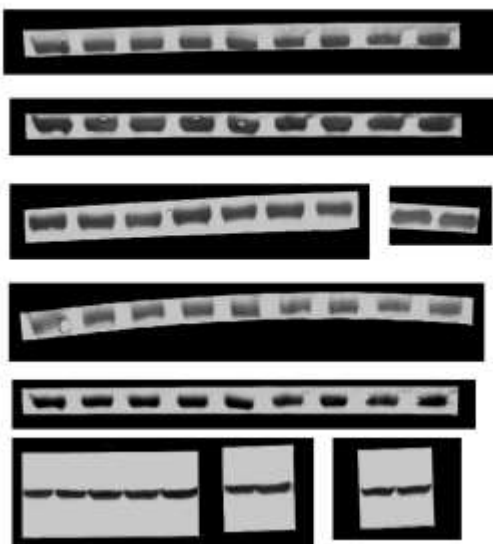

Supplement: 41420_2024_2132_MOESM1_ESM.pdf [file 41420_2024_2132_MOESM1_ESM.pdf]
